# Supplementary material
Source: publisher figshare collection journal article supplement (https://acs.figshare.com/ndownloader/files/3991363)
Supplement: Supplementary file 1 [file 3991363]

  
data_shelxl 
  
_audit_creation_method            SHELXL-97 
_chemical_name_systematic 
; 
 ? 
; 
_chemical_name_common             ? 
_chemical_melting_point           ? 
_chemical_formula_moiety          ? 
_chemical_formula_sum 
 'C22 H22 N4 O6' 
_chemical_formula_weight          438.44
_chemical_absolute_configuration       'S S' 
  
loop_ 
 _atom_type_symbol 
 _atom_type_description 
 _atom_type_scat_dispersion_real 
 _atom_type_scat_dispersion_imag 
 _atom_type_scat_source 
 'C'  'C'   0.0033   0.0016 
 'International Tables Vol C Tables 4.2.6.8 and 6.1.1.4' 
 'H'  'H'   0.0000   0.0000 
 'International Tables Vol C Tables 4.2.6.8 and 6.1.1.4' 
 'N'  'N'   0.0061   0.0033 
 'International Tables Vol C Tables 4.2.6.8 and 6.1.1.4' 
 'O'  'O'   0.0106   0.0060 
 'International Tables Vol C Tables 4.2.6.8 and 6.1.1.4' 
  
_symmetry_cell_setting            Monoclinic 
_symmetry_space_group_name_H-M    C2 
  
loop_ 
 _symmetry_equiv_pos_as_xyz 
 'x, y, z' 
 '-x, y, -z' 
 'x+1/2, y+1/2, z' 
 '-x+1/2, y+1/2, -z' 
  
_cell_length_a                    14.897(3) 
_cell_length_b                    6.8317(14) 
_cell_length_c                    20.380(4) 
_cell_angle_alpha                 90.00 
_cell_angle_beta                  102.13(3) 
_cell_angle_gamma                 90.00 
_cell_volume                      2027.8(7) 
_cell_formula_units_Z             4 
_cell_measurement_temperature     113(2) 
_cell_measurement_reflns_used     2992 
_cell_measurement_theta_min       2.7690 
_cell_measurement_theta_max       26.0680 
  
_exptl_crystal_description        ? 
_exptl_crystal_colour             ? 
_exptl_crystal_size_max           0.20 
_exptl_crystal_size_mid           0.18 
_exptl_crystal_size_min           0.12 
_exptl_crystal_density_meas       ? 
_exptl_crystal_density_diffrn     1.436 
_exptl_crystal_density_method     'not measured' 
_exptl_crystal_F_000              920 
_exptl_absorpt_coefficient_mu     0.107 
_exptl_absorpt_correction_type    MULTI-SCAN 
_exptl_absorpt_correction_T_min   0.9790 
_exptl_absorpt_correction_T_max   0.9873 
_exptl_absorpt_process_details    crystalclear 
  
_exptl_special_details 
;
 ? 
; 
  
_diffrn_ambient_temperature       113(2) 
_diffrn_radiation_wavelength      0.71073 
_diffrn_radiation_type            MoK\a 
_diffrn_radiation_source          'rotating anode' 
_diffrn_radiation_monochromator   confocal 
_diffrn_measurement_device_type   'rigaku saturn' 
_diffrn_measurement_method        '\w scans' 
_diffrn_detector_area_resol_mean  ? 
_diffrn_standards_number          0 
_diffrn_standards_interval_count  0 
_diffrn_standards_interval_time   0 
_diffrn_standards_decay_%         0 
_diffrn_reflns_number             8786 
_diffrn_reflns_av_R_equivalents   0.0649 
_diffrn_reflns_av_sigmaI/netI     0.1079 
_diffrn_reflns_limit_h_min        -18 
_diffrn_reflns_limit_h_max        17 
_diffrn_reflns_limit_k_min        -8 
_diffrn_reflns_limit_k_max        8 
_diffrn_reflns_limit_l_min        -24 
_diffrn_reflns_limit_l_max        25 
_diffrn_reflns_theta_min          2.77 
_diffrn_reflns_theta_max          26.01 
_reflns_number_total              3887 
_reflns_number_gt                 2545 
_reflns_threshold_expression      >2sigma(I) 
  
_computing_data_collection        'crystalclear' 
_computing_cell_refinement        'crystalclear' 
_computing_data_reduction         'crystalclear' 
_computing_structure_solution     'SHELXS-97 (Sheldrick, 1990)' 
_computing_structure_refinement   'SHELXL-97 (Sheldrick, 1997)' 
_computing_molecular_graphics     'Bruker SHELXTL' 
_computing_publication_material   'Bruker SHELXTL' 
  
_refine_special_details 
; 
 Refinement of F^2^ against ALL reflections.  The weighted R-factor wR and 
 goodness of fit S are based on F^2^, conventional R-factors R are based 
 on F, with F set to zero for negative F^2^. The threshold expression of 
 F^2^ > 2sigma(F^2^) is used only for calculating R-factors(gt) etc. and is 
 not relevant to the choice of reflections for refinement.  R-factors based 
 on F^2^ are statistically about twice as large as those based on F, and R- 
 factors based on ALL data will be even larger. 
; 
  
_refine_ls_structure_factor_coef  Fsqd 
_refine_ls_matrix_type            full 
_refine_ls_weighting_scheme       calc 
_refine_ls_weighting_details 
 'calc w=1/[\s^2^(Fo^2^)+(0.0380P)^2^+0.0000P] where P=(Fo^2^+2Fc^2^)/3' 
_atom_sites_solution_primary      direct 
_atom_sites_solution_secondary    difmap 
_atom_sites_solution_hydrogens    geom 
_refine_ls_hydrogen_treatment     mixed
_refine_ls_extinction_method      none 
_refine_ls_extinction_coef        ? 
_refine_ls_abs_structure_details 
 'Flack H D (1983), Acta Cryst. A39, 876-881' 
_refine_ls_abs_structure_Flack    1.7(14) 
_refine_ls_number_reflns          3887 
_refine_ls_number_parameters      297 
_refine_ls_number_restraints      2 
_refine_ls_R_factor_all           0.0679 
_refine_ls_R_factor_gt            0.0483 
_refine_ls_wR_factor_ref          0.1168 
_refine_ls_wR_factor_gt           0.1041 
_refine_ls_goodness_of_fit_ref    0.975 
_refine_ls_restrained_S_all       0.975 
_refine_ls_shift/su_max           0.000 
_refine_ls_shift/su_mean          0.000 
  
loop_ 
 _atom_site_label 
 _atom_site_type_symbol 
 _atom_site_fract_x 
 _atom_site_fract_y 
 _atom_site_fract_z 
 _atom_site_U_iso_or_equiv 
 _atom_site_adp_type 
 _atom_site_occupancy 
 _atom_site_symmetry_multiplicity 
 _atom_site_calc_flag 
 _atom_site_refinement_flags 
 _atom_site_disorder_assembly 
 _atom_site_disorder_group 
O1 O 0.52877(15) 0.0755(4) 0.57836(11) 0.0439(7) Uani 1 1 d . . . 
O2 O 0.53157(15) 0.3913(4) 0.58226(12) 0.0432(7) Uani 1 1 d . . . 
O3 O 0.59097(15) 0.1217(3) 0.73629(11) 0.0295(5) Uani 1 1 d . . . 
O4 O 0.40456(14) 0.7327(3) 0.80233(11) 0.0257(5) Uani 1 1 d . . . 
O5 O 0.40958(14) 0.0972(3) 0.75539(10) 0.0267(5) Uani 1 1 d . . . 
H5 H 0.4147 -0.0105 0.7758 0.040 Uiso 1 1 calc R . . 
O6 O 0.84011(13) 0.4142(3) 0.90391(11) 0.0283(5) Uani 1 1 d . . . 
H6 H 0.8442 0.3328 0.8738 0.042 Uiso 1 1 calc R . . 
N1 N 0.49118(18) 0.2357(4) 0.58240(13) 0.0315(7) Uani 1 1 d . . . 
N2 N 0.22743(19) 0.5485(4) 0.63086(15) 0.0369(7) Uani 1 1 d D . . 
N3 N 0.57513(16) 0.4496(4) 0.74223(12) 0.0217(6) Uani 1 1 d . . . 
N4 N 0.42221(16) 0.4081(4) 0.79967(12) 0.0210(6) Uani 1 1 d . . . 
C1 C 0.39442(19) 0.2381(5) 0.58514(15) 0.0229(7) Uani 1 1 d . . . 
C2 C 0.3441(2) 0.0775(5) 0.55772(15) 0.0285(7) Uani 1 1 d . . . 
H2A H 0.3741 -0.0300 0.5419 0.034 Uiso 1 1 calc R . . 
C3 C 0.2497(2) 0.0720(5) 0.55304(15) 0.0314(8) Uani 1 1 d . . . 
H3 H 0.2156 -0.0387 0.5336 0.038 Uiso 1 1 calc R . . 
C4 C 0.2057(2) 0.2241(5) 0.57610(16) 0.0298(8) Uani 1 1 d . . . 
H4 H 0.1410 0.2220 0.5724 0.036 Uiso 1 1 calc R . . 
C5 C 0.2578(2) 0.3815(5) 0.60499(16) 0.0259(7) Uani 1 1 d . . . 
C6 C 0.3010(2) 0.6638(5) 0.65341(18) 0.0361(9) Uani 1 1 d . . . 
H6A H 0.2973 0.7877 0.6738 0.043 Uiso 1 1 calc R . . 
C7 C 0.3811(2) 0.5841(5) 0.64386(15) 0.0242(7) Uani 1 1 d . . . 
C8 C 0.35482(19) 0.3978(5) 0.61159(14) 0.0215(7) Uani 1 1 d . . . 
C9 C 0.4695(2) 0.6873(4) 0.67232(15) 0.0246(7) Uani 1 1 d . . . 
H9A H 0.4573 0.8296 0.6735 0.029 Uiso 1 1 calc R . . 
H9B H 0.5125 0.6664 0.6420 0.029 Uiso 1 1 calc R . . 
C10 C 0.5169(2) 0.6187(4) 0.74442(15) 0.0219(7) Uani 1 1 d . . . 
H10 H 0.5573 0.7280 0.7659 0.026 Uiso 1 1 calc R . . 
C11 C 0.54985(19) 0.2652(4) 0.75122(14) 0.0206(7) Uani 1 1 d . . . 
C12 C 0.4742(2) 0.2301(4) 0.79045(15) 0.0219(7) Uani 1 1 d . . . 
C13 C 0.4452(2) 0.5868(4) 0.78540(14) 0.0203(7) Uani 1 1 d . . . 
C14 C 0.6624(2) 0.4833(5) 0.72163(17) 0.0318(8) Uani 1 1 d . . . 
H14A H 0.6548 0.4560 0.6736 0.048 Uiso 1 1 calc R . . 
H14B H 0.7095 0.3965 0.7471 0.048 Uiso 1 1 calc R . . 
H14C H 0.6812 0.6198 0.7305 0.048 Uiso 1 1 calc R . . 
C15 C 0.3427(2) 0.3848(5) 0.83160(17) 0.0284(7) Uani 1 1 d . . . 
H15A H 0.2890 0.4495 0.8041 0.043 Uiso 1 1 calc R . . 
H15B H 0.3567 0.4441 0.8764 0.043 Uiso 1 1 calc R . . 
H15C H 0.3296 0.2452 0.8355 0.043 Uiso 1 1 calc R . . 
C16 C 0.5239(2) 0.1507(4) 0.86045(16) 0.0244(7) Uani 1 1 d . . . 
H16A H 0.4784 0.1301 0.8889 0.029 Uiso 1 1 calc R . . 
H16B H 0.5527 0.0230 0.8548 0.029 Uiso 1 1 calc R . . 
C17 C 0.5969(2) 0.2933(4) 0.89485(14) 0.0223(7) Uani 1 1 d . . . 
C18 C 0.5741(2) 0.4464(5) 0.93373(16) 0.0319(8) Uani 1 1 d . . . 
H18 H 0.5135 0.4566 0.9412 0.038 Uiso 1 1 calc R . . 
C19 C 0.6401(2) 0.5839(6) 0.96155(16) 0.0374(9) Uani 1 1 d . . . 
H19 H 0.6245 0.6868 0.9884 0.045 Uiso 1 1 calc R . . 
C20 C 0.7284(2) 0.5717(5) 0.95034(15) 0.0297(8) Uani 1 1 d . . . 
H20 H 0.7730 0.6672 0.9687 0.036 Uiso 1 1 calc R . . 
C21 C 0.7512(2) 0.4204(5) 0.91240(15) 0.0233(7) Uani 1 1 d . . . 
C22 C 0.6862(2) 0.2817(4) 0.88532(14) 0.0211(7) Uani 1 1 d . . . 
H22 H 0.7031 0.1768 0.8598 0.025 Uiso 1 1 calc R . . 
H2 H 0.1677(9) 0.566(5) 0.6318(16) 0.034(9) Uiso 1 1 d D . . 
  
loop_ 
 _atom_site_aniso_label 
 _atom_site_aniso_U_11 
 _atom_site_aniso_U_22 
 _atom_site_aniso_U_33 
 _atom_site_aniso_U_23 
 _atom_site_aniso_U_13 
 _atom_site_aniso_U_12 
O1 0.0319(14) 0.0540(17) 0.0430(17) -0.0153(13) 0.0014(11) 0.0148(13) 
O2 0.0324(15) 0.0541(18) 0.0470(17) -0.0213(13) 0.0171(12) -0.0119(13) 
O3 0.0308(13) 0.0274(13) 0.0302(14) -0.0035(10) 0.0059(10) 0.0077(10) 
O4 0.0313(12) 0.0165(11) 0.0323(13) -0.0011(9) 0.0132(10) 0.0031(10) 
O5 0.0290(12) 0.0159(11) 0.0308(13) -0.0016(10) -0.0040(9) -0.0043(10) 
O6 0.0245(12) 0.0303(13) 0.0306(13) -0.0031(11) 0.0071(9) -0.0032(11) 
N1 0.0258(15) 0.0424(19) 0.0242(16) -0.0134(14) 0.0002(12) 0.0015(15) 
N2 0.0194(15) 0.0408(18) 0.050(2) -0.0046(15) 0.0060(13) 0.0081(14) 
N3 0.0200(14) 0.0231(15) 0.0230(14) 0.0004(11) 0.0068(11) 0.0018(11) 
N4 0.0242(14) 0.0156(12) 0.0239(15) -0.0001(11) 0.0067(11) 0.0005(11) 
C1 0.0168(15) 0.0328(18) 0.0179(16) -0.0004(14) 0.0011(12) -0.0002(14) 
C2 0.0283(18) 0.0300(18) 0.0262(18) -0.0019(15) 0.0033(14) 0.0005(15) 
C3 0.0341(19) 0.0323(19) 0.0249(18) -0.0022(15) -0.0006(14) -0.0116(16) 
C4 0.0198(16) 0.044(2) 0.0240(18) 0.0098(16) 0.0011(13) -0.0018(16) 
C5 0.0245(17) 0.0309(18) 0.0218(18) 0.0047(14) 0.0038(13) 0.0018(15) 
C6 0.034(2) 0.0305(19) 0.042(2) -0.0016(16) 0.0037(16) 0.0031(16) 
C7 0.0238(16) 0.0265(17) 0.0210(16) 0.0042(14) 0.0020(12) 0.0057(14) 
C8 0.0176(16) 0.0270(17) 0.0196(17) 0.0041(13) 0.0036(12) 0.0010(13) 
C9 0.0293(18) 0.0182(16) 0.0264(19) 0.0024(13) 0.0061(14) 0.0008(13) 
C10 0.0252(17) 0.0184(15) 0.0230(17) -0.0027(13) 0.0074(13) -0.0023(13) 
C11 0.0187(16) 0.0258(18) 0.0165(17) -0.0019(13) 0.0017(13) 0.0018(14) 
C12 0.0243(16) 0.0144(15) 0.0247(18) -0.0026(13) -0.0002(13) -0.0005(13) 
C13 0.0231(16) 0.0187(16) 0.0175(16) 0.0000(13) 0.0003(12) 0.0000(14) 
C14 0.0237(18) 0.039(2) 0.034(2) -0.0004(16) 0.0094(15) -0.0025(16) 
C15 0.0258(17) 0.0212(17) 0.041(2) 0.0031(15) 0.0136(15) -0.0022(14) 
C16 0.0248(17) 0.0202(16) 0.0260(18) 0.0035(13) 0.0007(13) 0.0017(13) 
C17 0.0258(17) 0.0253(16) 0.0146(17) 0.0022(13) 0.0018(13) -0.0024(14) 
C18 0.0248(18) 0.045(2) 0.0271(19) -0.0092(17) 0.0094(14) -0.0030(16) 
C19 0.035(2) 0.050(2) 0.0277(19) -0.0204(18) 0.0065(15) -0.0037(18) 
C20 0.0292(18) 0.0353(19) 0.0249(18) -0.0100(16) 0.0066(14) -0.0048(16) 
C21 0.0238(16) 0.0285(17) 0.0171(16) 0.0022(14) 0.0028(12) -0.0030(14) 
C22 0.0274(17) 0.0199(15) 0.0155(16) 0.0010(13) 0.0031(13) 0.0009(13) 
  
_geom_special_details 
; 
 All esds (except the esd in the dihedral angle between two l.s. planes) 
 are estimated using the full covariance matrix.  The cell esds are taken 
 into account individually in the estimation of esds in distances, angles 
 and torsion angles; correlations between esds in cell parameters are only 
 used when they are defined by crystal symmetry.  An approximate (isotropic) 
 treatment of cell esds is used for estimating esds involving l.s. planes. 
; 
  
loop_ 
 _geom_bond_atom_site_label_1 
 _geom_bond_atom_site_label_2 
 _geom_bond_distance 
 _geom_bond_site_symmetry_2 
 _geom_bond_publ_flag 
O1 N1 1.240(3) . ? 
O2 N1 1.222(4) . ? 
O3 C11 1.228(3) . ? 
O4 C13 1.252(3) . ? 
O5 C12 1.405(3) . ? 
O5 H5 0.8400 . ? 
O6 C21 1.372(3) . ? 
O6 H6 0.8400 . ? 
N1 C1 1.454(4) . ? 
N2 C6 1.349(4) . ? 
N2 C5 1.373(4) . ? 
N2 H2 0.902(10) . ? 
N3 C11 1.338(4) . ? 
N3 C10 1.451(4) . ? 
N3 C14 1.466(3) . ? 
N4 C13 1.317(4) . ? 
N4 C15 1.475(3) . ? 
N4 C12 1.475(4) . ? 
C1 C2 1.380(4) . ? 
C1 C8 1.401(4) . ? 
C2 C3 1.389(4) . ? 
C2 H2A 0.9500 . ? 
C3 C4 1.364(5) . ? 
C3 H3 0.9500 . ? 
C4 C5 1.384(4) . ? 
C4 H4 0.9500 . ? 
C5 C8 1.427(4) . ? 
C6 C7 1.363(4) . ? 
C6 H6A 0.9500 . ? 
C7 C8 1.448(4) . ? 
C7 C9 1.498(4) . ? 
C9 C10 1.562(4) . ? 
C9 H9A 0.9900 . ? 
C9 H9B 0.9900 . ? 
C10 C13 1.503(4) . ? 
C10 H10 1.0000 . ? 
C11 C12 1.531(4) . ? 
C12 C16 1.560(4) . ? 
C14 H14A 0.9800 . ? 
C14 H14B 0.9800 . ? 
C14 H14C 0.9800 . ? 
C15 H15A 0.9800 . ? 
C15 H15B 0.9800 . ? 
C15 H15C 0.9800 . ? 
C16 C17 1.517(4) . ? 
C16 H16A 0.9900 . ? 
C16 H16B 0.9900 . ? 
C17 C22 1.386(4) . ? 
C17 C18 1.396(4) . ? 
C18 C19 1.391(4) . ? 
C18 H18 0.9500 . ? 
C19 C20 1.384(4) . ? 
C19 H19 0.9500 . ? 
C20 C21 1.375(4) . ? 
C20 H20 0.9500 . ? 
C21 C22 1.384(4) . ? 
C22 H22 0.9500 . ? 
  
loop_ 
 _geom_angle_atom_site_label_1 
 _geom_angle_atom_site_label_2 
 _geom_angle_atom_site_label_3 
 _geom_angle 
 _geom_angle_site_symmetry_1 
 _geom_angle_site_symmetry_3 
 _geom_angle_publ_flag 
C12 O5 H5 109.5 . . ? 
C21 O6 H6 109.5 . . ? 
O2 N1 O1 122.6(3) . . ? 
O2 N1 C1 118.9(3) . . ? 
O1 N1 C1 118.5(3) . . ? 
C6 N2 C5 107.8(3) . . ? 
C6 N2 H2 131(2) . . ? 
C5 N2 H2 122(2) . . ? 
C11 N3 C10 123.9(2) . . ? 
C11 N3 C14 118.6(2) . . ? 
C10 N3 C14 117.1(2) . . ? 
C13 N4 C15 117.9(2) . . ? 
C13 N4 C12 124.6(2) . . ? 
C15 N4 C12 117.3(2) . . ? 
C2 C1 C8 122.6(3) . . ? 
C2 C1 N1 115.8(3) . . ? 
C8 C1 N1 121.6(3) . . ? 
C1 C2 C3 120.4(3) . . ? 
C1 C2 H2A 119.8 . . ? 
C3 C2 H2A 119.8 . . ? 
C4 C3 C2 120.6(3) . . ? 
C4 C3 H3 119.7 . . ? 
C2 C3 H3 119.7 . . ? 
C3 C4 C5 118.1(3) . . ? 
C3 C4 H4 120.9 . . ? 
C5 C4 H4 120.9 . . ? 
N2 C5 C4 127.5(3) . . ? 
N2 C5 C8 107.9(3) . . ? 
C4 C5 C8 124.6(3) . . ? 
N2 C6 C7 113.0(3) . . ? 
N2 C6 H6A 123.5 . . ? 
C7 C6 H6A 123.5 . . ? 
C6 C7 C8 104.7(3) . . ? 
C6 C7 C9 118.7(3) . . ? 
C8 C7 C9 136.2(3) . . ? 
C1 C8 C5 113.8(3) . . ? 
C1 C8 C7 139.8(3) . . ? 
C5 C8 C7 106.5(3) . . ? 
C7 C9 C10 114.2(2) . . ? 
C7 C9 H9A 108.7 . . ? 
C10 C9 H9A 108.7 . . ? 
C7 C9 H9B 108.7 . . ? 
C10 C9 H9B 108.7 . . ? 
H9A C9 H9B 107.6 . . ? 
N3 C10 C13 113.6(2) . . ? 
N3 C10 C9 111.4(2) . . ? 
C13 C10 C9 109.4(2) . . ? 
N3 C10 H10 107.4 . . ? 
C13 C10 H10 107.4 . . ? 
C9 C10 H10 107.4 . . ? 
O3 C11 N3 123.3(3) . . ? 
O3 C11 C12 117.7(3) . . ? 
N3 C11 C12 118.6(3) . . ? 
O5 C12 N4 106.0(2) . . ? 
O5 C12 C11 109.7(2) . . ? 
N4 C12 C11 113.7(2) . . ? 
O5 C12 C16 112.5(2) . . ? 
N4 C12 C16 109.3(2) . . ? 
C11 C12 C16 105.8(2) . . ? 
O4 C13 N4 121.0(3) . . ? 
O4 C13 C10 118.6(3) . . ? 
N4 C13 C10 120.3(3) . . ? 
N3 C14 H14A 109.5 . . ? 
N3 C14 H14B 109.5 . . ? 
H14A C14 H14B 109.5 . . ? 
N3 C14 H14C 109.5 . . ? 
H14A C14 H14C 109.5 . . ? 
H14B C14 H14C 109.5 . . ? 
N4 C15 H15A 109.5 . . ? 
N4 C15 H15B 109.5 . . ? 
H15A C15 H15B 109.5 . . ? 
N4 C15 H15C 109.5 . . ? 
H15A C15 H15C 109.5 . . ? 
H15B C15 H15C 109.5 . . ? 
C17 C16 C12 110.8(2) . . ? 
C17 C16 H16A 109.5 . . ? 
C12 C16 H16A 109.5 . . ? 
C17 C16 H16B 109.5 . . ? 
C12 C16 H16B 109.5 . . ? 
H16A C16 H16B 108.1 . . ? 
C22 C17 C18 118.5(3) . . ? 
C22 C17 C16 120.9(3) . . ? 
C18 C17 C16 120.4(3) . . ? 
C19 C18 C17 120.1(3) . . ? 
C19 C18 H18 119.9 . . ? 
C17 C18 H18 119.9 . . ? 
C20 C19 C18 120.4(3) . . ? 
C20 C19 H19 119.8 . . ? 
C18 C19 H19 119.8 . . ? 
C21 C20 C19 119.5(3) . . ? 
C21 C20 H20 120.2 . . ? 
C19 C20 H20 120.2 . . ? 
O6 C21 C20 116.9(3) . . ? 
O6 C21 C22 122.8(3) . . ? 
C20 C21 C22 120.3(3) . . ? 
C21 C22 C17 121.1(3) . . ? 
C21 C22 H22 119.5 . . ? 
C17 C22 H22 119.5 . . ? 
  
loop_ 
 _geom_torsion_atom_site_label_1 
 _geom_torsion_atom_site_label_2 
 _geom_torsion_atom_site_label_3 
 _geom_torsion_atom_site_label_4 
 _geom_torsion 
 _geom_torsion_site_symmetry_1 
 _geom_torsion_site_symmetry_2 
 _geom_torsion_site_symmetry_3 
 _geom_torsion_site_symmetry_4 
 _geom_torsion_publ_flag 
O2 N1 C1 C2 153.8(3) . . . . ? 
O1 N1 C1 C2 -24.2(4) . . . . ? 
O2 N1 C1 C8 -23.7(4) . . . . ? 
O1 N1 C1 C8 158.3(3) . . . . ? 
C8 C1 C2 C3 2.5(5) . . . . ? 
N1 C1 C2 C3 -175.0(3) . . . . ? 
C1 C2 C3 C4 -0.7(5) . . . . ? 
C2 C3 C4 C5 -0.9(5) . . . . ? 
C6 N2 C5 C4 -179.5(3) . . . . ? 
C6 N2 C5 C8 -0.7(4) . . . . ? 
C3 C4 C5 N2 179.6(3) . . . . ? 
C3 C4 C5 C8 1.0(5) . . . . ? 
C5 N2 C6 C7 0.4(4) . . . . ? 
N2 C6 C7 C8 0.1(4) . . . . ? 
N2 C6 C7 C9 -174.3(3) . . . . ? 
C2 C1 C8 C5 -2.4(4) . . . . ? 
N1 C1 C8 C5 175.0(2) . . . . ? 
C2 C1 C8 C7 179.2(3) . . . . ? 
N1 C1 C8 C7 -3.5(6) . . . . ? 
N2 C5 C8 C1 -178.3(3) . . . . ? 
C4 C5 C8 C1 0.6(4) . . . . ? 
N2 C5 C8 C7 0.7(3) . . . . ? 
C4 C5 C8 C7 179.6(3) . . . . ? 
C6 C7 C8 C1 178.1(4) . . . . ? 
C9 C7 C8 C1 -9.1(7) . . . . ? 
C6 C7 C8 C5 -0.5(3) . . . . ? 
C9 C7 C8 C5 172.4(3) . . . . ? 
C6 C7 C9 C10 91.8(3) . . . . ? 
C8 C7 C9 C10 -80.3(4) . . . . ? 
C11 N3 C10 C13 25.0(4) . . . . ? 
C14 N3 C10 C13 -162.0(2) . . . . ? 
C11 N3 C10 C9 -99.2(3) . . . . ? 
C14 N3 C10 C9 73.9(3) . . . . ? 
C7 C9 C10 N3 86.4(3) . . . . ? 
C7 C9 C10 C13 -40.1(3) . . . . ? 
C10 N3 C11 O3 164.9(3) . . . . ? 
C14 N3 C11 O3 -8.0(4) . . . . ? 
C10 N3 C11 C12 -23.6(4) . . . . ? 
C14 N3 C11 C12 163.5(3) . . . . ? 
C13 N4 C12 O5 -130.4(3) . . . . ? 
C15 N4 C12 O5 54.2(3) . . . . ? 
C13 N4 C12 C11 -9.9(4) . . . . ? 
C15 N4 C12 C11 174.7(2) . . . . ? 
C13 N4 C12 C16 108.1(3) . . . . ? 
C15 N4 C12 C16 -67.4(3) . . . . ? 
O3 C11 C12 O5 -55.4(3) . . . . ? 
N3 C11 C12 O5 132.7(3) . . . . ? 
O3 C11 C12 N4 -173.8(2) . . . . ? 
N3 C11 C12 N4 14.3(4) . . . . ? 
O3 C11 C12 C16 66.3(3) . . . . ? 
N3 C11 C12 C16 -105.7(3) . . . . ? 
C15 N4 C13 O4 4.5(4) . . . . ? 
C12 N4 C13 O4 -170.9(3) . . . . ? 
C15 N4 C13 C10 -171.5(3) . . . . ? 
C12 N4 C13 C10 13.1(4) . . . . ? 
N3 C10 C13 O4 165.1(3) . . . . ? 
C9 C10 C13 O4 -69.7(3) . . . . ? 
N3 C10 C13 N4 -18.7(4) . . . . ? 
C9 C10 C13 N4 106.5(3) . . . . ? 
O5 C12 C16 C17 176.7(2) . . . . ? 
N4 C12 C16 C17 -65.8(3) . . . . ? 
C11 C12 C16 C17 56.9(3) . . . . ? 
C12 C16 C17 C22 -89.5(3) . . . . ? 
C12 C16 C17 C18 86.7(4) . . . . ? 
C22 C17 C18 C19 0.5(5) . . . . ? 
C16 C17 C18 C19 -175.8(3) . . . . ? 
C17 C18 C19 C20 0.8(5) . . . . ? 
C18 C19 C20 C21 -1.2(5) . . . . ? 
C19 C20 C21 O6 -179.0(3) . . . . ? 
C19 C20 C21 C22 0.3(5) . . . . ? 
O6 C21 C22 C17 -179.8(3) . . . . ? 
C20 C21 C22 C17 1.0(4) . . . . ? 
C18 C17 C22 C21 -1.3(4) . . . . ? 
C16 C17 C22 C21 175.0(3) . . . . ? 
  
loop_ 
 _geom_hbond_atom_site_label_D 
 _geom_hbond_atom_site_label_H 
 _geom_hbond_atom_site_label_A 
 _geom_hbond_distance_DH 
 _geom_hbond_distance_HA 
 _geom_hbond_distance_DA 
 _geom_hbond_angle_DHA 
 _geom_hbond_site_symmetry_A 
O5 H5 O4  0.84 1.85 2.674(3) 165.8 1_545 
O6 H6 O4  0.84 1.99 2.753(3) 151.3 3_545 
N2 H2 O1  0.902(10) 2.128(19) 2.933(4) 148(3) 3_455 
N2 H2 O3  0.902(10) 2.65(3) 3.292(4) 129(2) 3_455 
  
_diffrn_measured_fraction_theta_max    0.994 
_diffrn_reflns_theta_full              26.01 
_diffrn_measured_fraction_theta_full   0.994 
_refine_diff_density_max    0.203 
_refine_diff_density_min   -0.297 
_refine_diff_density_rms    0.058 
